# Supplementary material
Source: Springer Nature journal article supplement (https://www.springermedizin.de/resource/supplementary/12885_2011_2863_MOESM7_ESM.pdf/9461938)

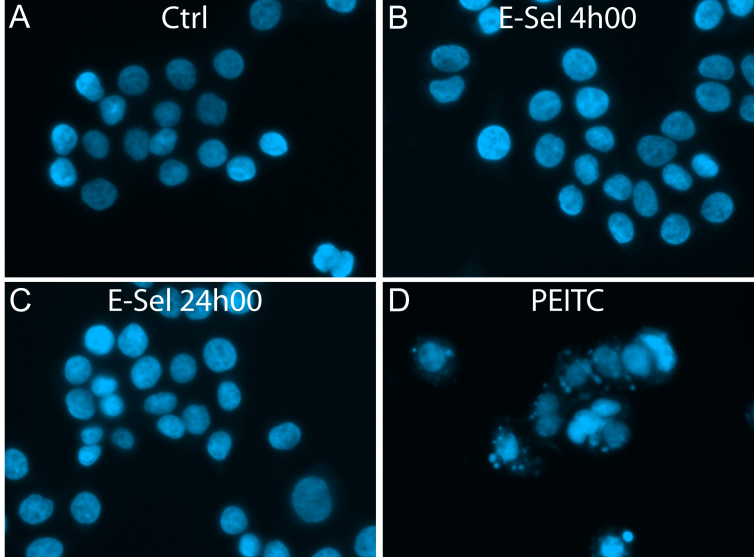

E

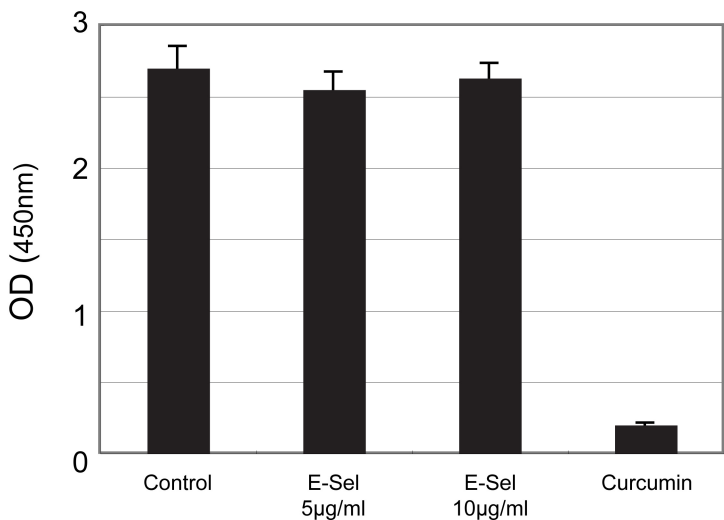

Supplement: MOESM7 [file 9461938]
